# Supplementary material for: Water Yam (Dioscorea alata L.) Growth and Tuber Yield as Affected by Rotation and Fertilization Regimes across an Environmental Gradient in West Africa
Source: MDPI journal article supplement (doi:10.3390/agronomy12040792), 2022-03-25
Supplement: s1 [file s1]

Archive with 1 entries (1 files):
- agronomy-1643899-supplementary.pdf
