# Supplementary material for: Water Yam (Dioscorea alata L.) Growth and Tuber Yield as Affected by Rotation and Fertilization Regimes across an Environmental Gradient in West Africa
Source: MDPI journal article supplement (doi:10.3390/agronomy12040792), 2022-03-25
Supplement: s1 [file s1 › agronomy-1643899-supplementary.pdf]

---

**Supplementary materials**

# **Water yam (*Dioscorea alata* L.) growth and tuber yield as affected by rotation and fertilization regimes across an environmental gradient in West Africa**

**Nestor Pouya <sup>1,2,3\*</sup>, Valérie Kouamé Hgaza <sup>2,4</sup>, Delwendé Innocent Kiba <sup>3,5</sup>, Lezin Bomisso<sup>1</sup>, Beatrice Aighewi<sup>6</sup>, Sévérin Aké<sup>1</sup>, and Emmanuel Frossard<sup>3</sup>**

<sup>1</sup> Laboratoire de Physiologie Végétale, Université Félix Houphouët Boigny, 22 BP 582 Abidjan, Côte d'Ivoire; akeseverin08@yahoo.fr, lebomisso@gmail.com

<sup>2</sup> Centre Suisse de Recherches Scientifiques en Côte d'Ivoire, 01 BP 1303 Abidjan, Côte d'Ivoire; hgaza.kouame@csrs.ci

<sup>3</sup> Group of Plant Nutrition, Institute of Agricultural Sciences, ETH Zurich, 8315 Lindau, Switzerland; emmanuel.frossard@usys.ethz.ch, delwende.kiba@usys.ethz.ch

<sup>4</sup> Département d'Agrophysiologie des Plantes, Université Peleforo Gon Coulibaly, BP 1328 Korhogo, Côte d'Ivoire;

<sup>5</sup> Centre National de la Recherche Scientifique et Technologique (CNRST), Institut de l'Environnement et de Recherches Agricoles (INERA), Laboratoire Ressources Naturelles et Innovations Agricoles (LARENIA), 01BP 476 Ouagadougou 01, Burkina Faso;

<sup>6</sup> International Institute of Tropical Agriculture, PMB 82, 901101 Abuja, Nigeria; B.Aighewi@cgiar.org

\* Correspondence: nestaledja@gmail.com

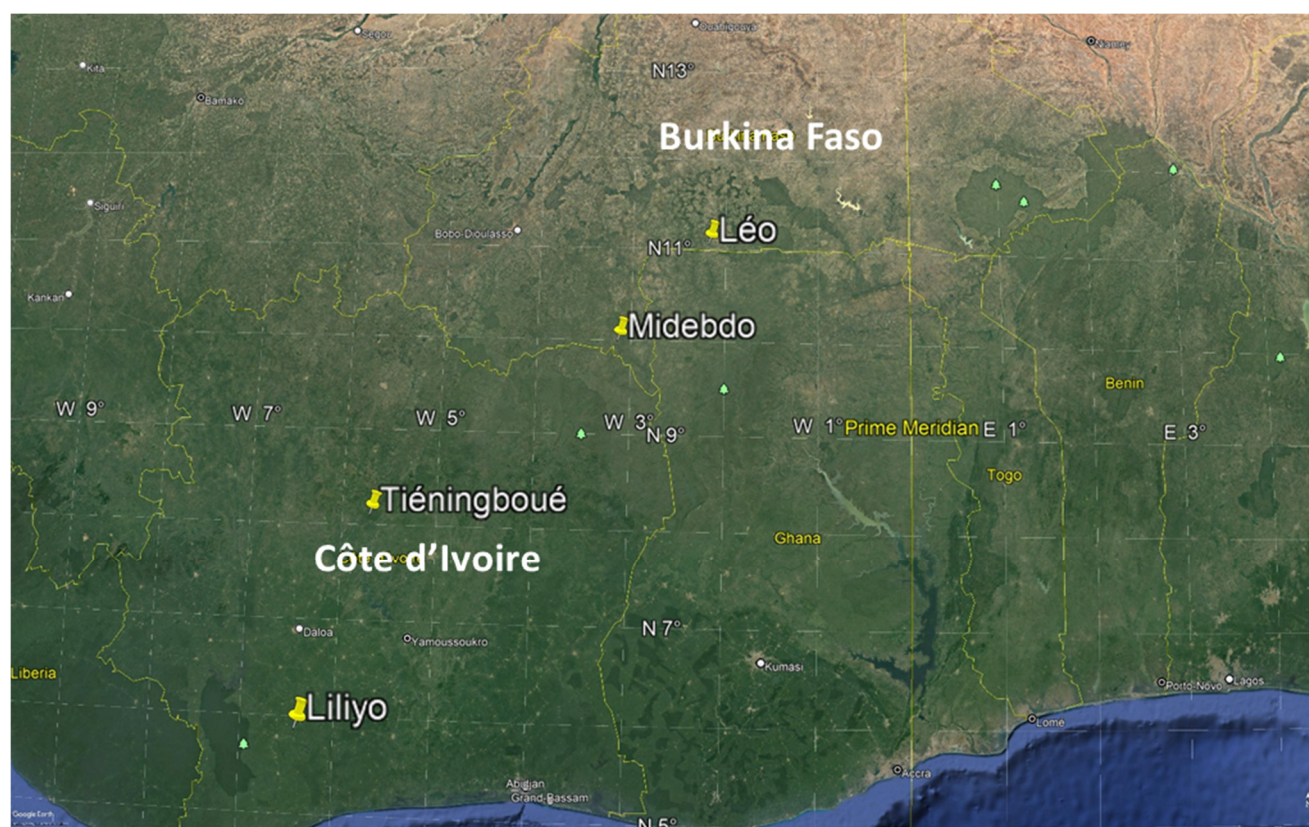

Figure S1. Map showing the four sites (source: Google Earth, 2022, buildings data layer [SIAO. NOAA. US. Navy. NGA. GEBCO, Image Landsat / Copernicus] Available at: <http://www.google.com/earth/index.html> [Accessed 12 March 2021]).

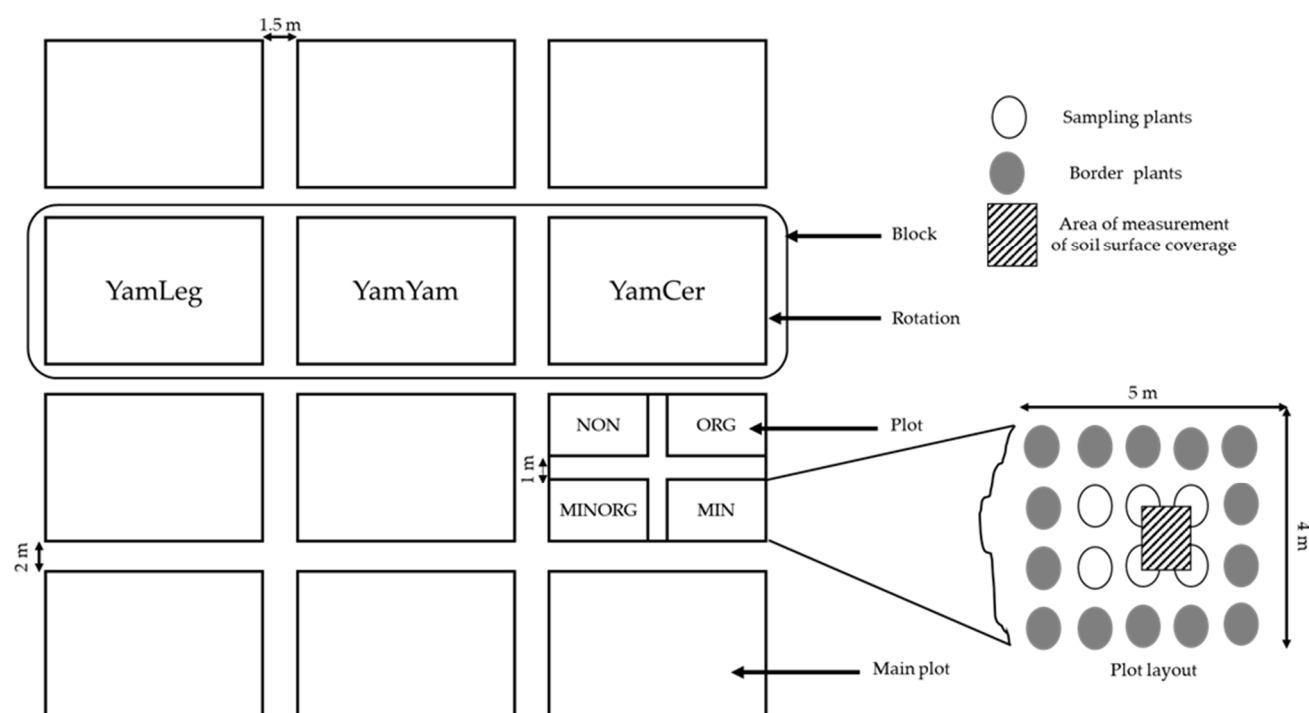

Figure S2. Layout of experiment installed in Liliyo and Tiéningboué (Côte d'Ivoire), and Midebdo and Léo (Burkina Faso) from 2016 to 2018. NON (no fertilization), MIN (sole mineral fertilization as NPK), MINORG combined organic and mineral fertilization) and ORG (sole organic fertilization as manure). YamCer = water yam – cereal – water yam, YamLeg = water yam – legume – water yam and YamYam = water yam – white yam – water yam.

**Table S1.** Amount of C, N, P and K added by mineral and organic fertilizers in 2017 on white guinea yam (*D. rotundata*) in the four sites, maize (*Zea mays*) in Liliyo, Midebdo and Léo and rice (*Oryza sativa*) in Tiéningboué.

| Site        | Fertilization       | Cereal              |       |       |       | White yam |       |       |       |
|-------------|---------------------|---------------------|-------|-------|-------|-----------|-------|-------|-------|
|             |                     | C                   | N     | P     | K     | C         | N     | P     | K     |
|             |                     | kg ha <sup>-1</sup> |       |       |       |           |       |       |       |
| Liliyo      | MIN                 | 66.9                | 147.8 | 18.3  | 49.4  | 23.4      | 51.6  | 2.5   | 87.2  |
|             | MINORG <sup>a</sup> | 2867.8              | 425.9 | 95.2  | 150.9 | 1002.3    | 148.8 | 31.3  | 87.7  |
|             | ORG                 | 5668.6              | 704.0 | 172.1 | 252.4 | 1981.3    | 246.1 | 60.1  | 88.2  |
| Tiéningboué | MIN                 | 38.8                | 85.6  | 14.7  | 96.5  | 23.4      | 51.6  | 2.5   | 87.2  |
|             | MINORG <sup>a</sup> | 1226.1              | 185.3 | 93.5  | 154.5 | 740.1     | 111.8 | 53.2  | 107.7 |
|             | ORG                 | 2413.4              | 284.9 | 172.3 | 212.5 | 1456.8    | 172.0 | 104.0 | 128.2 |
| Midebdo     | MIN                 | 66.9                | 147.8 | 18.3  | 49.4  | 23.4      | 51.6  | 2.5   | 87.2  |
|             | MINORG <sup>a</sup> | 1996.9              | 181.6 | 22.4  | 139.5 | 685.8     | 62.8  | 5.8   | 83.0  |
|             | ORG                 | 3926.8              | 215.4 | 26.6  | 229.6 | 1348.2    | 74.0  | 9.1   | 78.8  |
| Léo         | MIN                 | 66.9                | 147.8 | 18.3  | 49.4  | 23.4      | 51.6  | 2.5   | 87.2  |
|             | MINORG <sup>a</sup> | 1996.9              | 181.6 | 22.4  | 139.5 | 695.9     | 63.1  | 6.4   | 88.5  |
|             | ORG                 | 3926.8              | 215.4 | 26.6  | 229.6 | 1368.4    | 74.6  | 10.4  | 89.9  |

NON (no fertilization), MIN (sole mineral fertilization as NPK), MINORG combined organic and mineral fertilization) and ORG (sole organic fertilization as manure); Poultry and cow manures were sampled in each site and analyzed for their N, P and K contents. Total C and N contents were measured using an elemental analyzer (vario PYRO cube, Elementar Analysensysteme GmbH, Germany) and total P and K contents by ICP-OES after digestion with nitric acid (HNO<sub>3</sub>) based on Hoenig, (2001). a Cereal cultivated in Tiéningboué was rice while in the tree other sites, it was maize; a MINORG received half of NPK added in MIN as mineral fertilizer and half of manure added in ORG as manure

**Table S2.** Amount of C, N, P and K added by groundnut (*Arachis hypogaea*) straw incorporated in 2017 at Liliyo and Tiéningboué (Côte d'Ivoire), and Midebdo and Léo (Burkina Faso).

| Site        | Fertilization regimes | C                   | N    | P    | K    |
|-------------|-----------------------|---------------------|------|------|------|
|             |                       | kg ha <sup>-1</sup> |      |      |      |
| Liliyo      | NON                   | 774.4               | 49.5 | 3.1  | 36.4 |
|             | MIN                   | 804.8               | 46.9 | 2.9  | 40.4 |
|             | MINORG                | 490.9               | 26.5 | 4.1  | 26.3 |
|             | ORG                   | 841.3               | 49.0 | 7.6  | 30.1 |
| Tiéningboué | NON                   | 975.8               | 62.0 | 4.1  | 38.7 |
|             | MIN                   | 858.8               | 54.6 | 4.3  | 63.0 |
|             | MINORG                | 1098.0              | 70.7 | 6.39 | 63.9 |
|             | ORG                   | 981.8               | 68.3 | 6.5  | 61.7 |
| Midebdo     | NON                   | 522.0               | 20.2 | 3.0  | 18.7 |
|             | MIN                   | 572.1               | 25.2 | 1.7  | 23.8 |
|             | MINORG                | 633.0               | 23.2 | 2.3  | 33.7 |
|             | ORG                   | 598.5               | 26.2 | 2.4  | 27.4 |
| Léo         | NON                   | 1040.5              | 59.8 | 3.8  | 51.4 |
|             | MIN                   | 1400.6              | 77.1 | 5.3  | 81.6 |
|             | MINORG                | 1584.3              | 82.5 | 6.2  | 93.6 |
|             | ORG                   | 1512.9              | 77.2 | 7.1  | 93.6 |

NON (no fertilization), MIN (sole mineral fertilization as NPK), MINORG combined organic and mineral fertilization) and ORG (sole organic fertilization as manure).; Groundnut straw dry yields were measured at the harvest, and samples taken in each site. These samples were analyzed for their C, N, P and K contents. Total C and N contents were measured using an elemental analyzer (vario PYRO cube, Elementar Analysensysteme GmbH, Germany) and total P and K contents by ICP-OES after digestion with nitric acid (HNO<sub>3</sub>) based on Hoenig, (2001);

**Table S3.** Soil total carbon and pH (average  $\pm$  standard error) of the upper layer (0–30 cm) according to the rotations and fertilization regimes in Liliyo and Tiéningboué (Côte d’Ivoire), and Midebdo and Léo (Burkina Faso) measured in December 2017.

| Soil properties                     | Rotation | Fertilization regimes | Liliyo          | Tiéningboué     | Midebdo         | Léo            |
|-------------------------------------|----------|-----------------------|-----------------|-----------------|-----------------|----------------|
| Total C<br>(g kg <sup>-1</sup> sol) | YamCer   | NON                   | 6.3 $\pm$ 0.74  | 8.7 $\pm$ 0.32  | 3.7 $\pm$ 0.46  | 4.7 $\pm$ 0.64 |
|                                     | YamCer   | MIN                   | 9.0 $\pm$ 1.91  | 9.6 $\pm$ 1.34  | 5.24 $\pm$ 1.44 | 4.8 $\pm$ 0.73 |
|                                     | YamCer   | MINORG                | 7.2 $\pm$ 1.18  | 10.0 $\pm$ 1.38 | 4.4 $\pm$ 0.68  | 5.3 $\pm$ 0.86 |
|                                     | YamCer   | ORG                   | 8.3 $\pm$ 0.84  | 10.7 $\pm$ 1.77 | 6.5 $\pm$ 0.57  | 6.4 $\pm$ 1.25 |
|                                     | YamLeg   | NON                   | 6.5 $\pm$ 0.79  | 8.6 $\pm$ 0.40  | 4.6 $\pm$ 0.58  | 4.0 $\pm$ 0.76 |
|                                     | YamLeg   | MIN                   | 4.7 $\pm$ 0.31  | 9.3 $\pm$ 0.76  | 4.6 $\pm$ 0.73  | 4.7 $\pm$ 0.69 |
|                                     | YamLeg   | MINORG                | 5.8 $\pm$ 0.10  | 10.1 $\pm$ 2.24 | 5.6 $\pm$ 0.96  | 5.5 $\pm$ 1.99 |
|                                     | YamLeg   | ORG                   | 5.8 $\pm$ 0.73  | 10.6 $\pm$ 1.71 | 5.4 $\pm$ 0.45  | 4.7 $\pm$ 1.14 |
|                                     | YamYam   | NON                   | 8.9 $\pm$ 0.87  | 9.1 $\pm$ 0.81  | 2.6 $\pm$ 0.20  | 4.1 $\pm$ 0.40 |
|                                     | YamYam   | MIN                   | 11.9 $\pm$ 2.88 | 10.7 $\pm$ 1.39 | 4.1 $\pm$ 0.70  | 4.6 $\pm$ 1.14 |
|                                     | YamYam   | MINORG                | 13.9 $\pm$ 1.87 | 12.9 $\pm$ 1.98 | 3.3 $\pm$ 0.27  | 4.2 $\pm$ 0.37 |
|                                     | YamYam   | ORG                   | 10.3 $\pm$ 1.19 | 14.0 $\pm$ 2.33 | 4.3 $\pm$ 0.54  | 4.9 $\pm$ 0.94 |
| pH, H <sub>2</sub> O                | YamCer   | NON                   | 6.1 $\pm$ 0.3   | 5.7 $\pm$ 0.2   | 5.6 $\pm$ 0.3   | 5.2 $\pm$ 0.4  |
|                                     | YamCer   | MIN                   | 5.8 $\pm$ 0.2   | 5.2 $\pm$ 0.1   | 5.7 $\pm$ 0.4   | 5.1 $\pm$ 0.4  |
|                                     | YamCer   | MINORG                | 5.6 $\pm$ 0.3   | 5.8 $\pm$ 0.1   | 6.4 $\pm$ 0.5   | 5.5 $\pm$ 0.3  |
|                                     | YamCer   | ORG                   | 5.6 $\pm$ 0.4   | 5.7 $\pm$ 0.2   | 6.1 $\pm$ 0.3   | 6.1 $\pm$ 0.5  |
|                                     | YamLeg   | NON                   | 5.9 $\pm$ 0.2   | 5.4 $\pm$ 0.2   | 5.8 $\pm$ 0.2   | 5.0 $\pm$ 0.1  |
|                                     | YamLeg   | MIN                   | 5.6 $\pm$ 0.3   | 4.9 $\pm$ 0.2   | 5.5 $\pm$ 0.1   | 4.9 $\pm$ 0.1  |
|                                     | YamLeg   | MINORG                | 6.1 $\pm$ 0.2   | 5.3 $\pm$ 0.2   | 5.8 $\pm$ 0.3   | 5.3 $\pm$ 0.1  |
|                                     | YamLeg   | ORG                   | 6.0 $\pm$ 0.1   | 5.5 $\pm$ 0.2   | 6.0 $\pm$ 0.1   | 5.4 $\pm$ 0.1  |
|                                     | YamYam   | NON                   | 6.5 $\pm$ 0.3   | 5.3 $\pm$ 0.1   | 5.8 $\pm$ 0.4   | 4.4 $\pm$ 0.3  |
|                                     | YamYam   | MIN                   | 6.3 $\pm$ 0.2   | 5.5 $\pm$ 0.2   | 5.9 $\pm$ 0.5   | 4.3 $\pm$ 0.1  |
|                                     | YamYam   | MINORG                | 6.1 $\pm$ 0.2   | 5.5 $\pm$ 0.1   | 6.1 $\pm$ 0.1   | 4.8 $\pm$ 0.2  |
|                                     | YamYam   | ORG                   | 6.0 $\pm$ 0.1   | 6.0 $\pm$ 0.2   | 6.1 $\pm$ 0.2   | 5.7 $\pm$ 0.3  |

YamCer = water yam – cereal – water yam, YamLeg = water yam – legume – water yam and YamYam = water yam – white guinea yam – water yam; NON (no fertilization), MIN (sole mineral fertilization as NPK), MINORG combined organic and mineral fertilization) and ORG (sole organic fertilization as manure). Soil chemical properties presented (mean  $\pm$  standard errors) correspond of the mean of 4 soil samples taken in December 2017 at each experimental site. Total C was measured using an elemental analyzer (varioPYRO cube, Elementar Analysensysteme GmbH, Germany); pH using a pH electrode (Benchtop pH/ISE meter model 720A, Orion Research Inc., USA) in a soil:water (1:2) solution

**Table S4.** Soil carbon stocks (t ha<sup>-1</sup>) of the upper layer (0–30 cm) according to the rotations and fertilizations fertilization regimes in Liliyo and Tiéningboué (Côte d’Ivoire), and Midebdo and Léo (Burkina Faso) measured in May 2016 and December 2017.

|               | Rotation | Fertilization regimes | Liliyo | Tiéningboué | Midebdo | Léo   |
|---------------|----------|-----------------------|--------|-------------|---------|-------|
| May 2016      | YamCer   | NON                   | 28.15  | 35.48       | 17.91   | 16.98 |
|               | YamCer   | MIN                   | 40.33  | 34.74       | 14.56   | 15.90 |
|               | YamCer   | MINORG                | 34.78  | 37.45       | 15.29   | 18.01 |
|               | YamCer   | ORG                   | 39.85  | 38.28       | 21.93   | 19.68 |
|               | YamLeg   | NON                   | 34.32  | 33.85       | 17.88   | 15.85 |
|               | YamLeg   | MIN                   | 26.46  | 34.20       | 17.73   | 16.41 |
|               | YamLeg   | MINORG                | 30.36  | 32.11       | 17.33   | 24.39 |
|               | YamLeg   | ORG                   | 32.92  | 29.94       | 18.96   | 16.68 |
|               | YamYam   | NON                   | 30.36  | 27.75       | 20.13   | 17.50 |
|               | YamYam   | MIN                   | 35.06  | 35.92       | 17.88   | 17.35 |
|               | YamYam   | MINORG                | 31.92  | 39.75       | 16.46   | 18.66 |
|               | YamYam   | ORG                   | 39.75  | 40.81       | 17.73   | 18.24 |
|               | Average  |                       | 33.69  | 35.02       | 17.82   | 17.97 |
|               | se       |                       | 1.32   | 1.11        | 0.57    | 0.67  |
| December 2017 | YamCer   | NON                   | 21.79  | 26.35       | 14.25   | 15.94 |
|               | YamCer   | MIN                   | 30.93  | 28.99       | 19.13   | 15.98 |
|               | YamCer   | MINORG                | 24.87  | 30.19       | 16.15   | 17.54 |
|               | YamCer   | ORG                   | 28.69  | 32.44       | 23.63   | 20.03 |
|               | YamLeg   | NON                   | 22.43  | 25.98       | 16.94   | 15.76 |
|               | YamLeg   | MIN                   | 16.14  | 28.19       | 16.95   | 18.34 |
|               | YamLeg   | MINORG                | 20.11  | 30.48       | 20.56   | 21.26 |
|               | YamLeg   | ORG                   | 19.89  | 31.91       | 19.56   | 18.14 |
|               | YamYam   | NON                   | 28.03  | 27.48       | 9.50    | 16.04 |
|               | YamYam   | MIN                   | 31.80  | 32.45       | 15.08   | 17.87 |
|               | YamYam   | MINORG                | 47.88  | 38.85       | 12.16   | 16.42 |
|               | YamYam   | ORG                   | 35.39  | 42.37       | 15.74   | 19.21 |
|               | Average  |                       | 27.33  | 31.31       | 16.64   | 17.71 |
|               | se       |                       | 2.49   | 1.42        | 1.10    | 0.52  |

SOCs (t ha<sup>-1</sup>) = SOC (g kg<sup>-1</sup>) × BD (kg dm<sup>-3</sup>) × SLT (dm) × [1 – (GV/100)] where SOC: Soil carbon Stocks, SOC: Soil carbon content, BD: Bulk density, SLT : Soil layer thickness and GV : gravel volume (%). Soils were sampled in May 2016 and December 2017 and analyzed for C content using an elemental analyzer (varioPYRO cube, Elementar Analysensysteme GmbH, Germany). BD and GV were measured on two pits opened on each block on October 2020 using the cylinder method. YamCer = water yam – cereal – water yam, YamLeg = water yam – legume – water yam and YamYam = water yam – white guinea yam – water yam; NON (no fertilization), MIN (sole mineral fertilization as NPK), MINORG combined organic and mineral fertilization) and ORG. In 2016, the rotations showed correspond to plot names.

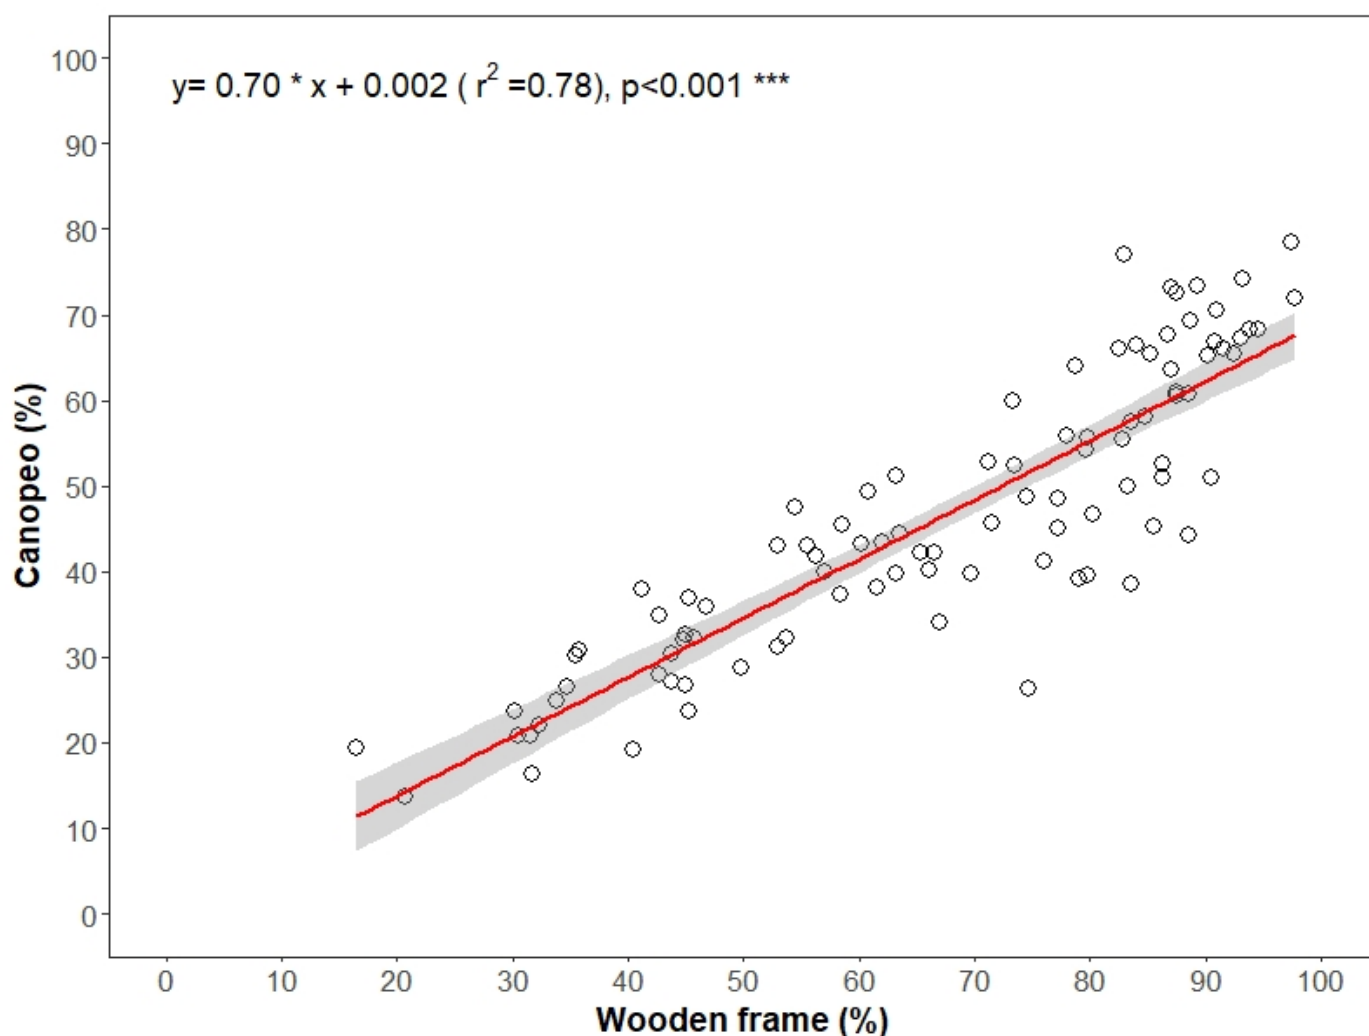

**Figure S3.** Relationship between soil surface coverage by water yam aboveground organs measured using the wooden frame (Burstall and Harris, 1983 modified by Diby et al., 2011b) and canopeo (Patrignani and Ochsner, 2015) in Tiéningboué in 2018 from 70 to 168 DAP ( $n=4$ ). The yam variety C18 was cultivated in the four sites after either a cereal, a legume or a yam for each fertilization regimes (NON, MIN, MINORG and ORG). The linear regression, the coefficient of determination ( $r^2$ ) and the p-value are shown in the graph. The grey band indicates the 95% confidence interval. NON (no fertilization), MIN (sole mineral fertilization as NPK), MINORG combined organic and mineral fertilization) and ORG (sole organic fertilization as manure).

**Table S5.** Summary of the linear mixed-effects model fitted by REML to assess the effect of site on sprout emergence rate (%) of water yam setts at 49 DAP in Liliyo and Tiéningboué (Côte d'Ivoire), and Midebdo and Léo (Burkina Faso) in 2016 and 2018. Water yam was cultivated in the presence of different fertilization regimes in 2016 and 2018. In 2018, for each fertilization regime, water yam was cultivated after either a cereal, a legume, or a yam for each fertilization regime.

| <b>2016 (Boxcox transformation)</b> |                   |                   |                      |                    |
|-------------------------------------|-------------------|-------------------|----------------------|--------------------|
| <b>Random effects:</b>              | <b>Std. error</b> |                   |                      |                    |
| Block                               | 0.00033           |                   |                      |                    |
| Block:Rotation                      | 60.95             |                   |                      |                    |
| Block:Rotation:Fertilization        | 0.147             |                   |                      |                    |
| <b>Fixed effects:</b>               | <b>Estimate</b>   | <b>Std. error</b> | <b>CI-95%</b>        | <b>p-value</b>     |
| Intercept (Liliyo)                  | 4692.84           | 76.15             | [4541.79; 4843.88]   | < 0.001            |
| Tiéningboué                         | 141.51            | 105.53            | [-67.82; 350.84]     | 0.18 <sup>ns</sup> |
| Midebdo                             | -331.13           | 104.78            | [-538.96; -123.30]   | 0.12 <sup>ns</sup> |
| Léo                                 | 154.57            | 106.35            | [-56.38; 365.53]     | 0.14 <sup>ns</sup> |
| <b>2018 (Boxcox transformation)</b> |                   |                   |                      |                    |
| <b>Random effects:</b>              | <b>Std. error</b> |                   |                      |                    |
| Block                               | 282.93            |                   |                      |                    |
| Block:Rotation                      | 201.91            |                   |                      |                    |
| Block:Rotation:Fertilization        | 0.093             |                   |                      |                    |
| <b>Fixed effects:</b>               | <b>Estimate</b>   | <b>Std. error</b> | <b>CI-95%</b>        | <b>p-value</b>     |
| Intercept (Liliyo)                  | 4781.00           | 226.75            | [4337.41; 5224.60]   | < 0.001            |
| Tiéningboué                         | -171.51           | 235.81            | [-632.83; -171.51]   | 0.46 <sup>ns</sup> |
| Midebdo                             | -1685.59          | 234.54            | [-2144.40; -1226.76] | < 0.001***         |
| Léo                                 | -670.08           | 235.81            | [-1131.40; -208.76]  | 0.0052 **          |

Between the parenthesis after the year is indicated the type of transformation used on the data before the analysis if applied. Asterisks indicate the significance of the difference between the sites for each year: ns not significant, \*\* p<0.01, \*\*\* p<0.001.

**Table S6.** Summary of the linear mixed-effects model fitted by REML to assess the effect of site on soil surface coverage (%) by water yam aboveground organs in Liliyo and Tiéningboué (Côte d'Ivoire), and Midebdo and Léo (Burkina Faso) in 2016 at 70, 84 and 98 days after planting (DAP). Water yam was cultivated in the presence of different fertilization regimes in 2016.

|                              |                   |                   |                  |                     |
|------------------------------|-------------------|-------------------|------------------|---------------------|
| <b>70 DAP</b>                |                   |                   |                  |                     |
| <b>Random effects:</b>       | <b>Std. error</b> |                   |                  |                     |
| Block                        | 1.77              |                   |                  |                     |
| Block:Rotation               | 6.89              |                   |                  |                     |
| Block:Rotation:Fertilization | 0.0012            |                   |                  |                     |
| <b>Fixed effects:</b>        | <b>Estimate</b>   | <b>Std. error</b> | <b>CI-95%</b>    | <b>p-value</b>      |
| Intercept (Liliyo)           | 70.68             | 2.43              | [65.87; 75.50]   | < 0.001             |
| Tiéningboué                  | -43.66            | 3.20              | [-50.00; -37.31] | < 0.001 ***         |
| Midebdo                      | -48.92            | 3.22              | [-55.29; -42.54] | < 0.001 ***         |
| Léo                          | -36.73            | 3.24              | [-43.14; -30.31] | < 0.001 ***         |
| <b>84 DAP</b>                |                   |                   |                  |                     |
| <b>Random effects:</b>       | <b>Std. error</b> |                   |                  |                     |
| Block                        | 6.35              |                   |                  |                     |
| Block:Rotation               | 3.76              |                   |                  |                     |
| Block:Rotation:Fertilization | 0.0031            |                   |                  |                     |
| <b>Fixed effects:</b>        | <b>Estimate</b>   | <b>Std. error</b> | <b>CI-95%</b>    | <b>p-value</b>      |
| Intercept (Liliyo)           | 80.64             | 2.92              | [74.85; 86.43]   | < 0.001             |
| Tiéningboué                  | -12.07            | 4.14              | [-20.26; -3.87]  | 0.051 <sup>ns</sup> |
| Midebdo                      | -41.12            | 4.14              | [-49.31; -32.93] | < 0.001 ***         |
| Léo                          | -30.34            | 4.18              | [-38.62; -22.06] | < 0.001 ***         |
| <b>98 DAP</b>                |                   |                   |                  |                     |
| <b>Random effects:</b>       | <b>Std. error</b> |                   |                  |                     |
| Block                        | 2.91              |                   |                  |                     |
| Block:Rotation               | 2.57              |                   |                  |                     |
| Block:Rotation:Fertilization | 0.0034            |                   |                  |                     |
| <b>Fixed effects:</b>        | <b>Estimate</b>   | <b>Std. error</b> | <b>CI-95%</b>    | <b>p-value</b>      |
| Intercept (Liliyo)           | 94.87             | 2.52              | [89.88; 99.86]   | < 0.001             |
| Tiéningboué                  | -7.59             | 3.58              | [-14.69; -0.50]  | 0.053 <sup>ns</sup> |
| Midebdo                      | -46.43            | 3.56              | [-53.49; -46.43] | < 0.001 ***         |
| Léo                          | -32.72            | 3.60              | [-39.85; -25.58] | < 0.001 ***         |

Asterisks indicate the significance of the difference between the sites for each year: ns not significant, \*\*\* p<0.001.

**Table S7.** Summary of the linear mixed-effects model fitted by REML to assess the effect of site on soil surface coverage (%) by water yam aboveground organs in Liliyo and Tiéningboué (Côte d'Ivoire), and Midebdo and Léo (Burkina Faso) in 2018 at 70, 84, 98 and 126 days after planting (DAP). Water yam was cultivated in the presence of different fertilization regimes after either a cereal, a legume, or a yam within each fertilization regime.

|                              |                   |                   |                  |                |
|------------------------------|-------------------|-------------------|------------------|----------------|
| <b>70 DAP</b>                |                   |                   |                  |                |
| <b>Random effects:</b>       | <b>Std. error</b> |                   |                  |                |
| Block                        | 3.21              |                   |                  |                |
| Block:Rotation               | 3.09              |                   |                  |                |
| Block:Rotation:Fertilization | 1.56              |                   |                  |                |
| <b>Fixed effects:</b>        | <b>Estimate</b>   | <b>Std. error</b> | <b>CI-95%</b>    | <b>p-value</b> |
| Intercept (Liliyo)           | 59.39             | 2.63              | [54.18; 64.59]   | < 0.001        |
| Tiéningboué                  | -36.25            | 2.64              | [-41.49; -31.01] | < 0.001 ***    |
| Midebdo                      | -49.37            | 2.64              | [-54.60; -44.13] | < 0.001 ***    |
| Léo                          | -31.76            | 2.66              | [-37.02; -26.49] | < 0.001 ***    |
| <b>84 DAP</b>                |                   |                   |                  |                |
| <b>Random effects:</b>       | <b>Std. error</b> |                   |                  |                |
| Block                        | 4.22              |                   |                  |                |
| Block:Rotation               | 0.0015            |                   |                  |                |
| Block:Rotation:Fertilization | 2.90              |                   |                  |                |
| <b>Fixed effects:</b>        | <b>Estimate</b>   | <b>Std. error</b> | <b>CI-95%</b>    | <b>p-value</b> |
| Intercept (Liliyo)           | 68.52             | 3.06              | [62.46; 74.58]   | < 0.001        |
| Tiéningboué                  | -30.17            | 3.08              | [-36.27; -24.07] | < 0.001 ***    |
| Midebdo                      | -47.48            | 3.07              | [-53.58; -41.38] | < 0.001 ***    |
| Léo                          | -30.07            | 3.08              | [-36.17; -23.97] | < 0.001 ***    |
| <b>98 DAP</b>                |                   |                   |                  |                |
| <b>Random effects:</b>       | <b>Std. error</b> |                   |                  |                |
| Block                        | 4.92              |                   |                  |                |
| Block:Rotation               | 0.0019            |                   |                  |                |
| Block:Rotation:Fertilization | 5.35              |                   |                  |                |
| <b>Fixed effects:</b>        | <b>Estimate</b>   | <b>Std. error</b> | <b>CI-95%</b>    | <b>p-value</b> |
| Intercept (Liliyo)           | 73.21             | 3.42              | [77.90; 89.91]   | < 0.001        |
| Tiéningboué                  | -26.77            | 3.17              | [-21.20; -7.63]  | < 0.001 ***    |
| Midebdo                      | -21.53            | 3.14              | [-32.89; -19.32] | < 0.001 ***    |
| Léo                          | -16.51            | 3.16              | [-32.12; -18.55] | < 0.001 ***    |
| <b>126 DAP</b>               |                   |                   |                  |                |
| <b>Random effects:</b>       | <b>Std. error</b> |                   |                  |                |
| Block                        | 2.94              |                   |                  |                |
| Block:Rotation               | 0.0011            |                   |                  |                |
| Block:Rotation:Fertilization | 6.94              |                   |                  |                |
| <b>Fixed effects:</b>        | <b>Estimate</b>   | <b>Std. error</b> | <b>CI-95%</b>    | <b>p-value</b> |
| Intercept (Liliyo)           | 90.54             | 2.75              | [85.09; 95.99]   | < 0.001        |
| Tiéningboué                  | -29.40            | 2.97              | [-35.29; -23.52] | < 0.001 ***    |
| Midebdo                      | -25.94            | 2.97              | [-31.82; -20.05] | < 0.001 ***    |
| Léo                          | -25.58            | 2.99              | [-31.50; -19.6]  | < 0.001 ***    |

Asterisks indicate the significance of the difference between the sites for each year: \*\*\*  $p < 0.001$ .

**Table S8.** Summary of the linear mixed-effects model fitted by REML to assess the effect of site on soil surface coverage (%) by water yam organs in Liliyo and Tiéningboué (Côte d'Ivoire), and Midebdo and Léo (Burkina Faso) in 2018 at 140, 154 and 168 days after planting (DAP). Water yam was cultivated in the presence of different fertilization regimes after either a cereal, a legume, or a yam for each fertilization regime.

|                              |                   |                   |                  |                |
|------------------------------|-------------------|-------------------|------------------|----------------|
| <b>140 DAP</b>               |                   |                   |                  |                |
| <b>Random effects:</b>       | <b>Std. error</b> |                   |                  |                |
| Block                        | 0.0013            |                   |                  |                |
| Block:Rotation               | 2.95              |                   |                  |                |
| Block:Rotation:Fertilization | 8.45              |                   |                  |                |
| <b>Fixed effects:</b>        | <b>Estimate</b>   | <b>Std. error</b> | <b>CI-95%</b>    | <b>p-value</b> |
| Intercept (Liliyo)           | 95.24             | 2.40              | [90.47; 100.00]  | < 0.001        |
| Tiéningboué                  | -37.04            | 2.93              | [-42.85; -31.24] | < 0.001 ***    |
| Midebdo                      | -20.34            | 2.92              | [-26.15; -14.53] | < 0.001 ***    |
| Léo                          | -30.20            | 2.97              | [36.08; -24.32]  | < 0.001 ***    |
| <b>154 DAP</b>               |                   |                   |                  |                |
| <b>Random effects:</b>       | <b>Std. error</b> |                   |                  |                |
| Block                        | 0.0019            |                   |                  |                |
| Block:Rotation               | 0.0066            |                   |                  |                |
| Block:Rotation:Fertilization | 7.03              |                   |                  |                |
| <b>Fixed effects:</b>        | <b>Estimate</b>   | <b>Std. error</b> | <b>CI-95%</b>    | <b>p-value</b> |
| Intercept (Liliyo)           | 95.62             | 2.36              | [90.93; 100.00]  | < 0.001        |
| Tiéningboué                  | -53.61            | 3.02              | [-59.59; -47.62] | < 0.001 ***    |
| Midebdo                      | -33.18            | 3.02              | [-39.17; -27.19] | < 0.001 ***    |
| Léo                          | -52.59            | 3.06              | [-58.65; -46.53] | < 0.001 ***    |
| <b>168 DAP</b>               |                   |                   |                  |                |
| <b>Random effects:</b>       | <b>Std. error</b> |                   |                  |                |
| Block                        | 2.77              |                   |                  |                |
| Block:Rotation               | 2.18              |                   |                  |                |
| Block:Rotation:Fertilization | 0.0034            |                   |                  |                |
| <b>Fixed effects:</b>        | <b>Estimate</b>   | <b>Std. error</b> | <b>CI-95%</b>    | <b>p-value</b> |
| Intercept (Liliyo)           | 64.66             | 2.55              | [59.60; 69.71]   | < 0.001        |
| Tiéningboué                  | -31.51            | 3.50              | [-38.44; -24.58] | < 0.001 ***    |
| Midebdo                      | -8.92             | 3.51              | [-15.86; -1.99]  | 0.012 **       |
| Léo                          | -52.86            | 0.54              | [-59.87; -45.85] | < 0.001 ***    |

Asterisks indicate the significance of the difference between the sites for each year: \*\* p<0.001, \*\*\* p<0.001.

**Table S9.** Mean soil surface coverage (expressed in % of soil surface covered) by water yam aboveground organs according to the rotations and fertilization regimes in Liliyo and Tiéningboué (Côte d'Ivoire), and Midebdo and Léo (Burkina Faso) measured in 2016 and 2018. The values in parenthesis represent the coefficients of variation.

| Year | Rotation                   | Fertilization regimes | Liliyo      | Tiéningboué | Midebdo     | Léo         |
|------|----------------------------|-----------------------|-------------|-------------|-------------|-------------|
| 2016 | YamCer<br>YamLeg<br>YamYam | NON                   | 78.7 (23.2) | 54.9 (55.1) | 36.8 (62.7) | 44.0 (47.0) |
|      |                            | MIN                   | 80.3 (24.5) | 58.8 (51.0) | 53.5 (48.7) | 64.5 (36.0) |
|      |                            | MINORG                | 83.8 (22.2) | 63.6 (47.2) | 46.5 (50.7) | 49.8 (42.7) |
|      |                            | ORG                   | 85.5 (20.6) | 65.6 (49.0) | 41.8 (45.9) | 53.7 (46.5) |
| 2018 | YamCer                     | NON                   | 77.6 (18.3) | 42.3 (47.4) | 30.0 (67.6) | 30.0 (73.1) |
|      | YamCer                     | MIN                   | 81.5 (21.9) | 41.4 (51.9) | 57.6 (54.5) | 45.9 (58.2) |
|      | YamCer                     | MINORG                | 82.9 (21.1) | 49.3 (40.2) | 60.8 (47.0) | 54.0 (56.9) |
|      | YamCer                     | ORG                   | 83.4 (21.1) | 48.4 (42.4) | 62.0 (46.2) | 37.4 (53.0) |
|      | YamLeg                     | NON                   | 70.4 (23.1) | 42.3 (41.5) | 40.2 (52.8) | 42.7 (56.6) |
|      | YamLeg                     | MIN                   | 80.2 (21.0) | 48.1 (42.4) | 62.3 (41.8) | 52.4 (50.9) |
|      | YamLeg                     | MINORG                | 80.9 (27.5) | 53.9 (32.9) | 52.4 (49.6) | 50.1 (60.7) |
|      | YamLeg                     | ORG                   | 83.1 (20.4) | 50.4 (35.9) | 47.7 (64.7) | 51.1 (47.9) |
|      | YamYam                     | NON                   | 69.5 (31.1) | 34.3 (42.0) | 39.4 (64.1) | 34.8 (49.7) |
|      | YamYam                     | MIN                   | 75.8 (28.4) | 55.6 (33.4) | 48.2 (53.2) | 45.7 (54.7) |
|      | YamYam                     | MINORG                | 82.8 (17.4) | 51.2 (39.3) | 38.9 (62.3) | 50.8 (49.7) |
|      | YamYam                     | ORG                   | 78.5 (29.5) | 40.7 (51.9) | 57.8 (47.5) | 54.6 (48.2) |

In 2016, the varieties cultivated were C18 for Liliyo, Woroba for Tiéningboué and Florido for Midebdo and Léo. In 2018, yam variety C18 was cultivated in the four sites after either a cereal, a legume or a yam for each fertilization regime. The fertilization regimes are: NON (no fertilization), MIN (sole mineral fertilization as NPK), MINORG combined organic and mineral fertilization) and ORG. In 2018, yam variety C18 was cultivated in the four sites after either a cereal (YamCer), a legume (YamLeg) or a yam (YamYam) for each fertilization regime. In 2016, the rotations showed correspond to plot names.

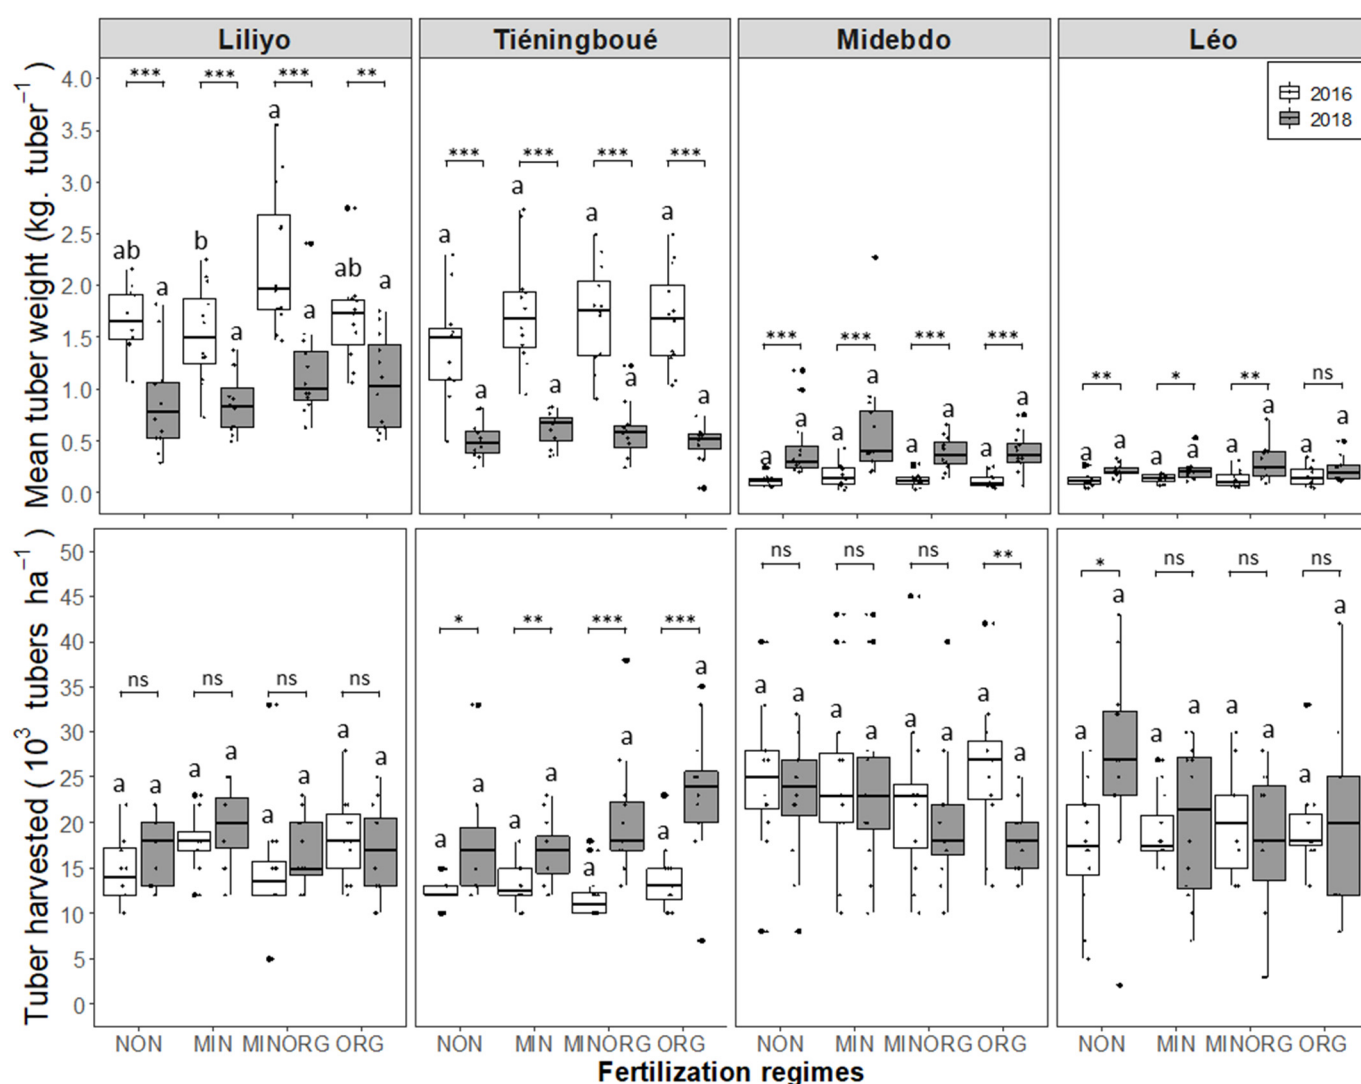

**Figure S4.** Effect of years and fertilization regimes on water yam mean tuber weights and tuber number in Liliyo and Tiéningboué (Côte d'Ivoire), and Midebdo and Léo (Burkina Faso) in 2016 and 2018. In 2016, the varieties cultivated were C18 for Liliyo, Woroba for Tiéningboué and Florido for Midebdo and Léo. In 2018, yam variety C18 was cultivated in the four sites after either a cereal, a legume or a yam for each fertilization regime. For each site and each year, different letters denote significant differences between fertilization regimes calculated by Tukey test at  $p$ -level  $\leq 0.05$  ( $n = 12$  replicates per fertilization). Asterisks indicate the results of the t-test assessing the significance of the difference between the years for each site and fertilization regimes: ns not significant, \*  $p < 0.05$ , \*\*  $p < 0.01$ , \*\*\*  $p < 0.001$ . The fertilization regimes are: NON (no fertilization), MIN (sole mineral fertilization as NPK), MINORG combined organic and mineral fertilization) and ORG.

**Table S10.** Summary of the linear mixed-effects model fitted by REML to assess the effect of site on water yam fresh tuber yields (t ha<sup>-1</sup>) in Liliyo and Tiéningboué (Côte d'Ivoire), and Midebdo and Léo (Burkina Faso) in 2016 and 2018. Water yam was cultivated in the presence of different fertilization regimes in 2016 and 2018. In 2018, for each fertilization regime, water yam was cultivated after either a cereal, a legume, or a yam for each fertilization regime.

| <b>2016 (log transformation)</b> |                   |                   |                 |                |
|----------------------------------|-------------------|-------------------|-----------------|----------------|
| <b>Random effects:</b>           | <b>Std. error</b> |                   |                 |                |
| Block                            | 7.67              |                   |                 |                |
| Block:Rotation                   | 3.82              |                   |                 |                |
| Block:Rotation:Fertilization     | 0.14              |                   |                 |                |
| <b>Fixed effects:</b>            | <b>Estimate</b>   | <b>Std. error</b> | <b>CI-95%</b>   | <b>p-value</b> |
| Intercept (Liliyo)               | 3.40              | 0.05              | [3.29; 3.51]    | < 0.001        |
| Tiéningboué                      | -0.43             | 0.07              | [-0.57; -0.28]  | < 0.001 ***    |
| Midebdo                          | -2.51             | 0.07              | [-2.66; -2.37]  | < 0.001 ***    |
| Léo                              | -2.61             | 0.07              | [-2.75; -2.46]  | < 0.001 ***    |
| <b>2018</b>                      |                   |                   |                 |                |
| <b>Random effects:</b>           | <b>Std. error</b> |                   |                 |                |
| Block                            | 5.54              |                   |                 |                |
| Block:Rotation                   | 1.12              |                   |                 |                |
| Block:Rotation:Fertilization     | 0.0007            |                   |                 |                |
| <b>Fixed effects:</b>            | <b>Estimate</b>   | <b>Std. error</b> | <b>CI-95%</b>   | <b>p-value</b> |
| Intercept (Liliyo)               | 16.44             | 0.71              | [15.03; 17.85]  | < 0.001        |
| Tiéningboué                      | -5.83             | 0.90              | [-7.62; -4.04]  | < 0.001 ***    |
| Midebdo                          | -7.47             | 0.89              | [-9.25; -5.70]  | < 0.001 ***    |
| Léo                              | -11.24            | 0.90              | [-13.04; -9.44] | < 0.001 ***    |

Between the parenthesis after the year is indicated the type of transformation used on the data before the analysis if applied. Asterisks indicate the significance of the difference between the sites for each year: \*\*\* p<0.001.

**Table S11.** Summary of the linear mixed-effects model fitted by REML to assess the effect of fertilization regime on water yam fresh tuber yields (t ha<sup>-1</sup>) in Liliyo and Tiéningboué (Côte d'Ivoire), and Midebdo and Léo (Burkina Faso) in 2016 cultivated in the presence of different fertilization regimes.

|                                     |                   |                   |                |                    |
|-------------------------------------|-------------------|-------------------|----------------|--------------------|
| <b>Liliyo</b>                       |                   |                   |                |                    |
| <b>Random effects:</b>              | <b>Std. error</b> |                   |                |                    |
| Block                               | 0.00057           |                   |                |                    |
| Block:Rotation                      | 0.00033           |                   |                |                    |
| <b>Fixed effects:</b>               | <b>Estimate</b>   | <b>Std. error</b> | <b>CI-95%</b>  | <b>p-value</b>     |
| Intercept (NON)                     | 27.32             | 3.05              | [21.36; 33.28] | < 0.001            |
| MIN                                 | 4.18              | 4.32              | [-4.24; 12.61] | 0.34 <sup>ns</sup> |
| MINORG                              | 8.20              | 4.32              | [-0.22; 16.63] | 0.06 <sup>ns</sup> |
| ORG                                 | 6.29              | 4.42              | [-2.32; 14.91] | 0.16 <sup>ns</sup> |
| <b>Tiéningboué</b>                  |                   |                   |                |                    |
| <b>Random effects:</b>              | <b>Std. error</b> |                   |                |                    |
| Block                               | 2.08              |                   |                |                    |
| Block:Rotation                      | 0.00055           |                   |                |                    |
| <b>Fixed effects:</b>               | <b>Estimate</b>   | <b>Std. error</b> | <b>CI-95%</b>  | <b>p-value</b>     |
| Intercept (NON)                     | 17.19             | 1.72              | [13.83; 20.55] | < 0.001            |
| MIN                                 | 4.63              | 1.84              | [1.03; 8.23]   | 0.05 <sup>ns</sup> |
| MINORG                              | 2.48              | 1.84              | [-1.11; 6.08]  | 0.18 <sup>ns</sup> |
| ORG                                 | 5.30              | 1.84              | [1.70; 8.91]   | 0.007 **           |
| <b>Midebdo (log transformation)</b> |                   |                   |                |                    |
| <b>Random effects:</b>              | <b>Std. error</b> |                   |                |                    |
| Block                               | 1.86              |                   |                |                    |
| Block:Rotation                      | 0.16              |                   |                |                    |
| <b>Fixed effects:</b>               | <b>Estimate</b>   | <b>Std. error</b> | <b>CI-95%</b>  | <b>p-value</b>     |
| Intercept (NON)                     | 0.82              | 0.12              | [0.57; 1.07]   | < 0.001            |
| MIN                                 | 0.25              | 0.16              | [-0.07; 0.58]  | 0.14 <sup>ns</sup> |
| MINORG                              | 0.02              | 0.16              | [-0.30; 0.35]  | 0.87 <sup>ns</sup> |
| ORG                                 | -0.01             | 0.16              | [-0.34; 0.31]  | 0.94 <sup>ns</sup> |
| <b>Léo (log transformation)</b>     |                   |                   |                |                    |
| <b>Random effects:</b>              | <b>Std. error</b> |                   |                |                    |
| Block                               | 1.39              |                   |                |                    |
| Block:Rotation                      | 0.19              |                   |                |                    |
| <b>Fixed effects:</b>               | <b>Estimate</b>   | <b>Std. error</b> | <b>CI-95%</b>  | <b>p-value</b>     |
| Intercept (NON)                     | 0.57              | 0.12              | [0.32; 0.83]   | < 0.001            |
| MIN                                 | 0.33              | 0.15              | [0.01; 0.66]   | 0.05 <sup>ns</sup> |
| MINORG                              | 0.17              | 0.16              | [-0.15; 0.51]  | 0.28 <sup>ns</sup> |
| ORG                                 | 0.37              | 0.16              | [0.04; 0.71]   | 0.02 *             |

Between the parenthesis after the site name is indicated the type of transformation used on the data before the analysis if applied. Asterisks indicate the significance of the difference between the sites for each year: ns not significant, \* p<0.05, \*\* p<0.01.

**Table S12.** Fresh tuber yield (t ha<sup>-1</sup>) of water yam according to the rotations and fertilizations fertilization regimes in Liliyo and Tiéningboué (Côte d'Ivoire), and Midebdo and Léo (Burkina Faso) measured in 2016 and 2018. The values in parenthesis represent the coefficients of variation expressed in % of the mean yield.

| Year | Rotation                     | Fertilization regimes | Liliyo      | Tiéningboué | Midebdo     | Léo         |
|------|------------------------------|-----------------------|-------------|-------------|-------------|-------------|
| 2016 | YamCer,<br>YamLeg,<br>YamYam | NON                   | 27.3 (25.4) | 17.0 (31.2) | 2.5 (38.2)  | 1.9 (38.2)  |
|      |                              | MIN                   | 31.5 (35.2) | 21.8 (17.0) | 3.3 (47.3)  | 2.6 (23.6)  |
|      |                              | MINORG                | 35.5 (34.6) | 19.7 (18.1) | 2.5 (35.3)  | 2.4 (47.7)  |
|      |                              | ORG                   | 33.6 (33.8) | 22.5 (29.1) | 2.5 (49.6)  | 2.9 (49.4)  |
| 2018 | YamCer                       | NON                   | 16.1 (52.5) | 10.9 (30.9) | 7.3 (14.9)  | 4.7 (41.6)  |
|      | YamCer                       | MIN                   | 15.4 (38.0) | 7.4 (42.0)  | 11.1 (31.9) | 3.8 (59.1)  |
|      | YamCer                       | MINORG                | 18.7 (23.3) | 14.0 (35.8) | 12.2 (16.8) | 9.3 (79.2)  |
|      | YamCer                       | ORG                   | 19.1 (28.7) | 12.3 (31.6) | 8.8 (32.1)  | 2.8 (66.8)  |
|      | YamLeg                       | NON                   | 15.4 (28.1) | 8.5 (20.3)  | 8.6 (40.6)  | 6.1 (66.7)  |
|      | YamLeg                       | MIN                   | 20.8 (27.3) | 11.3 (18.0) | 12.1 (58.8) | 7.3 (79.7)  |
|      | YamLeg                       | MINORG                | 17.3 (15.3) | 11.5 (24.2) | 7.9 (31.7)  | 4.4 (100.9) |
|      | YamLeg                       | ORG                   | 17.6 (22.9) | 12.5 (37.3) | 5.8 (80.6)  | 5.4 (42.4)  |
|      | YamYam                       | NON                   | 11.0 (60.3) | 7.2 (53.8)  | 9.6 (54.5)  | 5.8 (11.9)  |
|      | YamYam                       | MIN                   | 13.8 (39.9) | 12.5 (17.1) | 13.7 (62.4) | 3.1 (21.2)  |
|      | YamYam                       | MINORG                | 18.9 (34.2) | 8.2 (34.7)  | 3.4 (39.9)  | 4.9 (87.7)  |
|      | YamYam                       | ORG                   | 13.3 (34.5) | 10.5 (66.4) | 7.0 (28.4)  | 4.6 (82.5)  |

In 2016, the varieties cultivated were C18 for Liliyo, Woroba for Tiéningboué and Florido for Midebdo and Léo. In 2018, yam variety C18 was cultivated in the four sites after either a cereal, a legume or a yam for each fertilization re-gime. The fertilization regimes are: NON (no fertilization), MIN (sole mineral fertilization as NPK), MINORG combined organic and mineral fertilization) and ORG (sole organic fertilization as manure). In 2018, yam variety C18 was cultivated in the four sites after either a cereal (YamCer), a legume (YamLeg) or a yam (YamYam) for each fertilization regime. In 2016, the rotations showed correspond to plot names.

**Table S13.** Rainfall use efficiency (kg ha<sup>-1</sup> mm<sup>-1</sup>) according to fertilization regimes in Liliyo and Tiéningboué (Côte d'Ivoire), Midebdo and Léo (Burkina Faso) in 2016 and 2018. In 2018, yam variety C18 was cultivated in the four sites after either a cereal, a legume or a yam for each fertilization regime. The values following  $\pm$  after the means are standard errors.

| Year | Fertilization regimes | Liliyo         | Tiéningboué    | Midebdo        | Léo            |
|------|-----------------------|----------------|----------------|----------------|----------------|
| 2016 | NON                   | 6.8 $\pm$ 0.51 | 5.0 $\pm$ 0.52 | 1.3 $\pm$ 0.14 | 0.7 $\pm$ 0.08 |
|      | MIN                   | 8.5 $\pm$ 0.93 | 5.9 $\pm$ 0.39 | 1.7 $\pm$ 0.23 | 0.9 $\pm$ 0.06 |
|      | MINORG                | 8.5 $\pm$ 0.91 | 5.4 $\pm$ 0.33 | 1.2 $\pm$ 0.13 | 0.8 $\pm$ 0.12 |
|      | ORG                   | 8.2 $\pm$ 0.90 | 6.0 $\pm$ 0.56 | 1.2 $\pm$ 0.18 | 1.1 $\pm$ 0.16 |
| 2018 | NON                   | 2.3 $\pm$ 0.31 | 2.5 $\pm$ 0.30 | 2.3 $\pm$ 0.26 | 2.2 $\pm$ 0.27 |
|      | MIN                   | 2.7 $\pm$ 0.31 | 2.7 $\pm$ 0.26 | 3.1 $\pm$ 0.47 | 1.7 $\pm$ 0.39 |
|      | MINORG                | 2.7 $\pm$ 0.22 | 2.7 $\pm$ 0.32 | 1.9 $\pm$ 0.34 | 2.0 $\pm$ 0.54 |
|      | ORG                   | 2.5 $\pm$ 0.21 | 3.0 $\pm$ 0.38 | 1.7 $\pm$ 0.25 | 1.6 $\pm$ 0.33 |

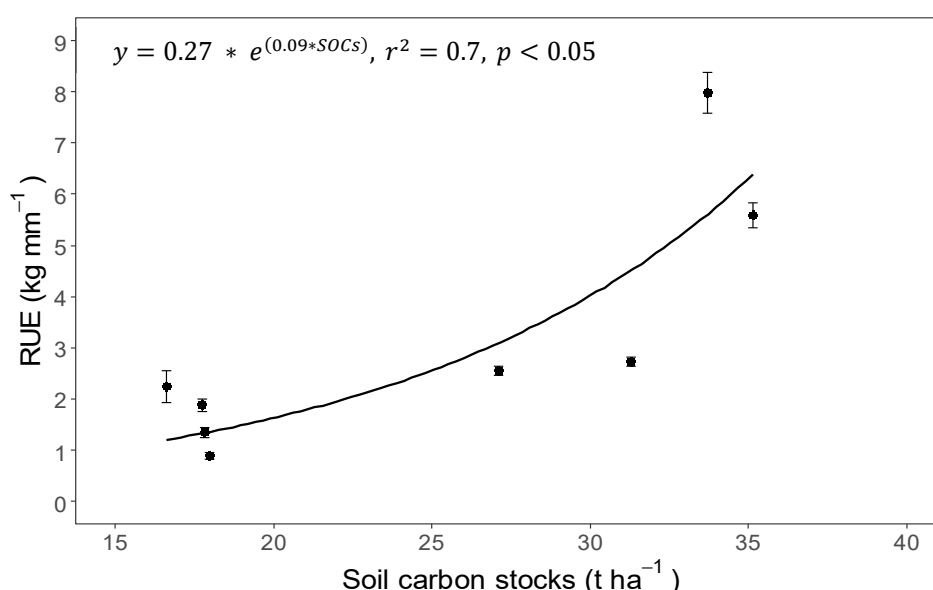

**Figure S5.** Relationship between rainfall use efficiency (RUE) by water yam cultivated under various fertilization regimes (NON, MIN, MINORG and ORG) and soil carbon stocks in Liliyo and Tiéningboué (Côte d'Ivoire), and Midebdo and Léo (Burkina Faso) in 2016 and 2018. In 2018, yam variety C18 was cultivated in the four sites after either a cereal, a legume or a yam for each fertilization regime. The regression equation, the coefficient of determination and the p value are shown on the graphs. Each point of RUE and soil carbon stock represents a mean of 48 replicates. The fertilization regimes are: NON (no fertilization), MIN (sole mineral fertilization as NPK), MINORG combined organic and mineral fertilization) and ORG (sole organic fertilization as manure).

**Table S14.** Summary of variables significantly associated to each cluster identified by the hierarchical clustering on principal components performed on data of water yam cultivated under various fertilization regimes (NON, MIN, MINORG and ORG) in Liliyo, Tiéningboué, Midebdo and Léo in 2016.

| Cluster | Variables                   | Mean within cluster | Over all mean | p.value |
|---------|-----------------------------|---------------------|---------------|---------|
| (1)     | SSC_70 (%)                  | 70.7                | 38.2          | ***     |
|         | Yield (t ha <sup>-1</sup> ) | 32.0                | 14.3          | ***     |
|         | SSC_98 (%)                  | 94.9                | 73.1          | *       |
|         | SOCs (t ha <sup>-1</sup> )  | 33.7                | 26.1          | *       |
| (2)     | SOCs (t ha <sup>-1</sup> )  | 35.1                | 26.1          | *       |
| (3)     | Yield (t ha <sup>-1</sup> ) | 2.4                 | 14.34         | *       |
|         | SOCs (t ha <sup>-1</sup> )  | 17.9                | 26.1          | *       |
|         | pH (water)                  | 5.3                 | 6.0           | *       |
| (4)     | pH (water)                  | 7.1                 | 6.0           | ***     |
|         | Yield (t ha <sup>-1</sup> ) | 2.7                 | 14.3          | *       |
|         | SOCs (t ha <sup>-1</sup> )  | 17.8                | 26.1          | *       |
|         | SSC_98 (%)                  | 48.4                | 73.1          | **      |
|         | Final_Em (%)                | 93.2                | 96.6          | ***     |

Mean within cluster represent the mean of each variable for all individuals belonging to the cluster. Overall mean represents the means of each variable for all the data set using for the analysis (mean of 192 observations). Clusters 1, 2, 3 and 4 correspond respectively to Lilio, Tiéningboué, Midebdo and Léo. SOC<sub>s</sub> = Soil carbon stocks; pH = pH (H<sub>2</sub>O); Final\_EM = final yam emergence rate; SSC\_70 = Soil surface coverage by water yam above-ground organs at 70 days after planting; Yield = Yam fresh tubers yields in t ha<sup>-1</sup>.

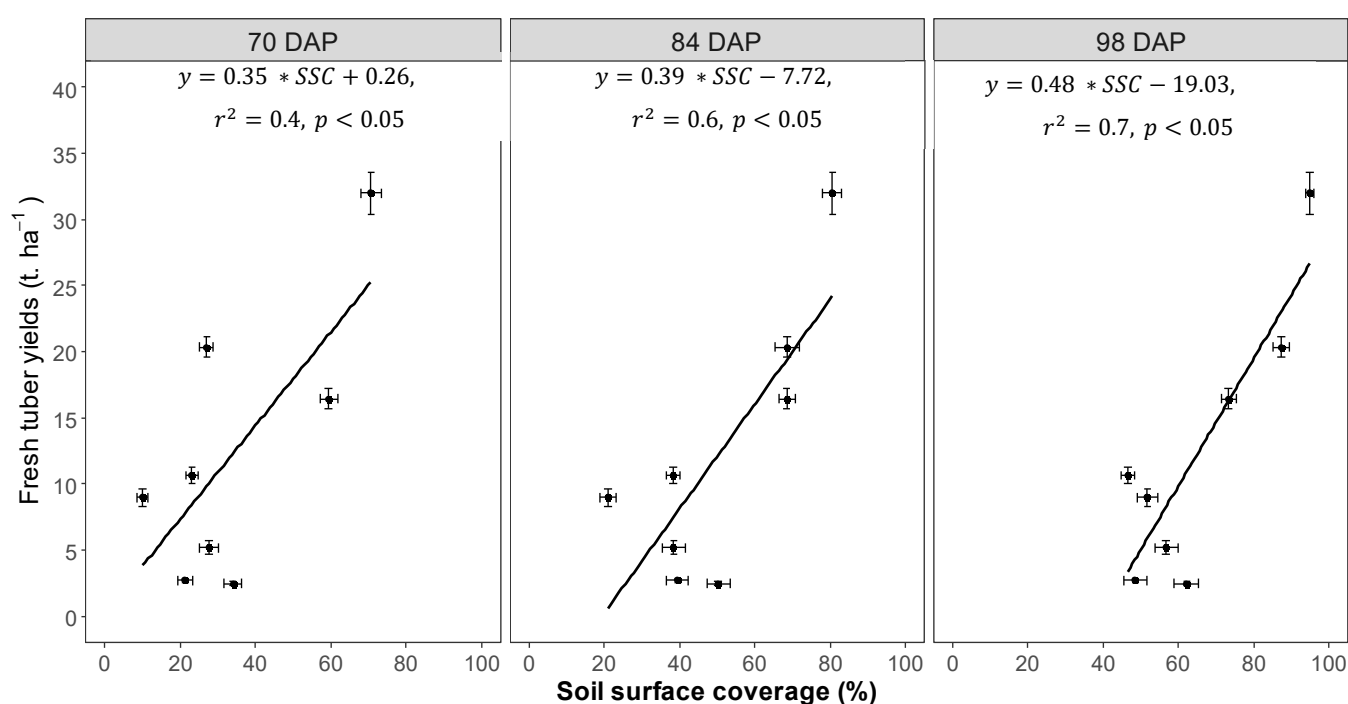

**Figure S6.** Relationships between yam fresh tuber yields and soil surface coverage by water yam aboveground organs measured in Liliyo and Tiéningboué (Côte d'Ivoire), and Midebdo and Léo (Burkina Faso) in 2016 and 2018 at 70, 84 and 98 DAP ( $n=4$ ). The yam variety C18 was cultivated in the four sites after either a cereal, a legume or a yam for each fertilization regimes (NON, MIN, MINORG and ORG). The linear regressions, the coefficients of determination ( $r^2$ ) and the  $p$ -values are shown in the graph. Each point represents a mean of 192 observations both for fresh tuber yield and soil surface coverage. DAP =days after planting; NON (no fertilization), MIN (sole mineral fertilization as NPK), MINORG combined organic and mineral fertilization) and ORG (sole organic fertilization as manure).

**Table S15.** Summary of variables significantly associated to each cluster identified by the hierarchical clustering on principal components performed on data of water yam cultivated in Liliyo, Tiéningboué, Midebdo and Léo after either a cereal, a legume or a yam under various fertilization regimes (NON, MIN, MINORG and ORG) in 2018.

| Cluster | Variables                   | Mean within cluster | Over all mean | p.value |
|---------|-----------------------------|---------------------|---------------|---------|
| (1)     | SSC_70 (%)                  | 59.4                | 30.1          | ***     |
|         | SSC_154 (%)                 | 95.6                | 60.8          | ***     |
|         | Yield (t ha <sup>-1</sup> ) | 16.5                | 10.3          | ***     |
|         | SSC_126 (%)                 | 90.5                | 70.4          | ***     |
|         | SSC_98 (%)                  | 73.2                | 57.0          | ***     |
|         | Final_Em (%)                | 97.6                | 89.2          | ***     |
|         | SOCs (t ha <sup>-1</sup> )  | 27.3                | 21.7          | **      |
| (2)     | Final_Em (%)                | 94.1                | 89.2          | ***     |
|         | SSC_98 (%)                  | 51.8                | 57.0          | ***     |
|         | Yield (t ha <sup>-1</sup> ) | 8.4                 | 10.3          | ***     |
|         | SSC_126 (%)                 | 63.7                | 70.4          | ***     |
|         | SSC_154 (%)                 | 44.0                | 60.8          | ***     |
|         | pH (water)                  | 5.4                 | 5.8           | ***     |
| (3)     | pH (water)                  | 6.4                 | 5.8           | ***     |
|         | Yield (t ha <sup>-1</sup> ) | 8.0                 | 10.3          | **      |
|         | SOCs (t ha <sup>-1</sup> )  | 15.5                | 21.7          | ***     |
|         | SSC_70 (%)                  | 12.6                | 30.1          | ***     |
|         | Final_Em (%)                | 72.9                | 89.2          | ***     |

Mean within cluster represent the mean of each variable for all individuals belonging to the cluster. Over all mean represents the means of each variable for all the data set using for the analysis (mean of 192 observations). SOC<sub>s</sub> = Soil carbon stocks; pH = pH (H<sub>2</sub>O); Final\_EM = final yam emergence rate; SC<sub>70</sub>, SC<sub>98</sub>, SC<sub>126</sub>, and 154 = Soil surface coverage by water yam aboveground organs at 70, 98, 126, and 154 days after planting; Yield = Yam fresh tubers yields in t ha<sup>-1</sup>.

**Table S16.** Amount of N (kg ha<sup>-1</sup>) fixed by groundnut in Liliyo and Tiéningboué (Côte d'Ivoire), and Midebdo and Léo (Burkina Faso) in 2017.

| Year | Fertilization regimes | Liliyo | Tiéningboué | Midebdo | Léo  |
|------|-----------------------|--------|-------------|---------|------|
| 2016 | NON                   | 32.6   | 37.9        | 28.0    | 53.5 |
|      | MIN                   | 20.3   | 54.0        | 20.6    | 63.0 |
|      | MINORG                | 30.2   | 37.8        | 15.3    | 36.5 |
|      | ORG                   | 37.3   | 52.1        | 24.1    | 58.9 |

N fixation was measured using the <sup>15</sup>N natural abundance method (Unkovich, 2008).
